# Supplementary material for: The male blue crab,Callinectes sapidus, uses both chromatic and achromatic cues during mate choice
Source: Oxford University Press journal article supplement (doi:10.1242/jeb.067512), 2012-03-07
Supplement: jeb067512tables1.pdf [file jeb067512tables1.pdf]

**Supplementary Table S1.** The results of binary choice experiments testing male preferences for photographs of females with red or orange claw coloration are presented. The number of displays made to each color, the side of first display, and the preferred side are presented. Totals are shown with results of two-tailed exact binomial tests.

**Red vs. Orange 0.48**

| Preferred Color         | Number of Displays |        |                         | First Display | Preferred Side          |
|-------------------------|--------------------|--------|-------------------------|---------------|-------------------------|
|                         | Red                | Orange | Total                   |               |                         |
| Red                     | 3                  | 1      | 4                       | Red           | Right                   |
| Red                     | 4                  | 2      | 6                       | Red           | Left                    |
| Red                     | 3                  | 0      | 3                       | Orange 0.48   | Left                    |
| Orange 0.48             | 1                  | 8      | 9                       | Red           | Left                    |
| Orange 0.48             | 0                  | 8      | 8                       | Orange 0.48   | Right                   |
| Red                     | 14                 | 3      | 17                      | Red           | Right                   |
| Red                     | 17                 | 5      | 22                      | Red           | Left                    |
| Red                     | 4                  | 0      | 4                       | Red           | Right                   |
| Red                     | 1                  | 0      | 1                       | Red           | Right                   |
| Orange 0.48             | 1                  | 8      | 9                       | Orange 0.48   | Right                   |
| Red                     | 4                  | 0      | 4                       | Red           | Right                   |
| Red                     | 5                  | 0      | 5                       | Red           | Right                   |
| Red                     | 3                  | 0      | 3                       | Red           | Right                   |
| Red                     | 3                  | 0      | 3                       | Red           | Left                    |
| Red                     | 3                  | 1      | 4                       | Red           | Right                   |
| Red                     | 3                  | 0      | 3                       | Red           | Left                    |
| Red                     | 11                 | 9      | 20                      | Red           | Left                    |
| Red                     | 14                 | 5      | 19                      | Orange 0.48   | Right                   |
| Red                     | 7                  | 0      | 7                       | Red           | Right                   |
| <b>Red 16: Orange 3</b> |                    |        | <b>Red 15: Orange 4</b> |               | <b>Left 7: Right 12</b> |
| <b>p≤0.004</b>          |                    |        | <b>p≤0.019</b>          |               | <b>n.s.</b>             |

**Red vs. Orange 0.85**

| Preferred Color        | Number of Displays |        |                        | First Display | Preferred Side         |
|------------------------|--------------------|--------|------------------------|---------------|------------------------|
|                        | Red                | Orange | Total                  |               |                        |
| Red                    | 4                  | 1      | 5                      | red           | Right                  |
| Orange 0.85            | 0                  | 7      | 7                      | Orange 0.85   | Right                  |
| Orange 0.85            | 1                  | 3      | 4                      | Orange 0.85   | Left                   |
| Red                    | 2                  | 1      | 3                      | Red           | Right                  |
| Red                    | 8                  | 3      | 11                     | Red           | Right                  |
| Orange 0.85            | 1                  | 5      | 6                      | Orange 0.85   | Left                   |
| Red                    | 10                 | 1      | 11                     | Red           | Right                  |
| Orange 0.85            | 6                  | 3      | 9                      | Orange 0.85   | Right                  |
| Red                    | 3                  | 1      | 4                      | Red           | Left                   |
| Red                    | 1                  | 0      | 1                      | Red           | Left                   |
| Orange 0.85            | 1                  | 4      | 5                      | Orange 0.85   | Left                   |
| Orange 0.85            | 0                  | 4      | 4                      | Orange 0.85   | Right                  |
| Orange 0.85            | 1                  | 5      | 6                      | Orange 0.85   | Left                   |
| Orange 0.85            | 2                  | 7      | 9                      | Orange 0.85   | Left                   |
| Red                    | 3                  | 1      | 4                      | Red           | Right                  |
| <b>Red 8: Orange 7</b> |                    |        | <b>Red 8: Orange 7</b> |               | <b>Left 7: Right 8</b> |
| <b>n.s.</b>            |                    |        | <b>n.s.</b>            |               | <b>n.s.</b>            |

**Red vs. Orange 2.6**

| Preferred Color | Number of Displays      |        |       | First Display           | Preferred Side           |
|-----------------|-------------------------|--------|-------|-------------------------|--------------------------|
|                 | Red                     | Orange | Total |                         |                          |
| Orange 2.6      | 0                       | 2      | 2     | Orange 2.6              | Right                    |
| Red             | 3                       | 0      | 3     | Red                     | Right                    |
| Orange 2.6      | 0                       | 2      | 2     | Orange 2.6              | Right                    |
| Orange 2.6      | 0                       | 4      | 4     | Orange 2.6              | Left                     |
| Red             | 6                       | 3      | 9     | Red                     | Right                    |
| Orange 2.6      | 2                       | 4      | 6     | Orange 2.6              | Left                     |
| Orange 2.6      | 1                       | 10     | 11    | Orange 2.6              | Left                     |
| Red             | 1                       | 0      | 1     | Red                     | Right                    |
| Red             | 11                      | 0      | 11    | Red                     | Left                     |
| Red             | 14                      | 1      | 15    | Red                     | Left                     |
| Red             | 10                      | 0      | 10    | Red                     | Right                    |
| Orange 2.6      | 3                       | 10     | 13    | Orange 2.6              | Right                    |
| Red             | 14                      | 0      | 14    | Red                     | Right                    |
| Red             | 5                       | 2      | 7     | Red                     | Left                     |
| Red             | 15                      | 9      | 24    | Orange 2.6              | Left                     |
| Red             | 6                       | 4      | 10    | Red                     | Left                     |
| Orange 2.6      | 0                       | 10     | 10    | Orange 2.6              | Left                     |
| Orange 2.6      | 0                       | 9      | 9     | Orange 2.6              | Right                    |
| Red             | 4                       | 0      | 4     | Red                     | Left                     |
| Red             | 16                      | 0      | 16    | Red                     | Right                    |
| Red             | 16                      | 2      | 18    | Red                     | Left                     |
|                 | <b>Red 13: Orange 8</b> |        |       | <b>Red 12: Orange 9</b> | <b>Right 10: Left 11</b> |
|                 | <b>n.s.</b>             |        |       | <b>n.s.</b>             | <b>n.s.</b>              |

**Red vs. Orange 5.1**

| Preferred Color | Number of Displays      |        |       | First Display           | Preferred Side         |
|-----------------|-------------------------|--------|-------|-------------------------|------------------------|
|                 | Red                     | Orange | Total |                         |                        |
| Red             | 8                       | 0      | 8     | Red                     | Left                   |
| Orange 5.1      | 3                       | 6      | 9     | Red                     | Left                   |
| Red             | 3                       | 2      | 5     | Red                     | Left                   |
| Red             | 19                      | 11     | 30    | Red                     | Right                  |
| Red             | 11                      | 2      | 13    | Red                     | Left                   |
| Orange 5.1      | 0                       | 5      | 5     | Orange 5.1              | Right                  |
| Red             | 5                       | 4      | 9     | Red                     | Right                  |
| Red             | 16                      | 1      | 17    | Red                     | Left                   |
| Red             | 12                      | 3      | 15    | Red                     | Left                   |
| Red             | 3                       | 0      | 3     | Red                     | Right                  |
| Red             | 10                      | 3      | 13    | Red                     | Right                  |
| Red             | 4                       | 1      | 5     | Orange 5.1              | Right                  |
| Red             | 16                      | 1      | 17    | Red                     | Right                  |
| Red             | 11                      | 0      | 11    | Red                     | Left                   |
|                 | <b>Red 12: Orange 2</b> |        |       | <b>Red 12: Orange 2</b> | <b>Left 7: Right 7</b> |
|                 | <b>p≤0.001</b>          |        |       | <b>p≤0.001</b>          | <b>n.s.</b>            |

**Red vs. Orange 7.7**

| Preferred Color | Number of Displays |        |       | First Display | Preffered Side |
|-----------------|--------------------|--------|-------|---------------|----------------|
|                 | Red                | Orange | Total |               |                |
| Red             | 8                  | 0      | 8     | Red           | Right          |
| Red             | 6                  | 1      | 7     | Red           | Left           |
| Red             | 5                  | 1      | 6     | Red           | Left           |
| Red             | 10                 | 3      | 13    | Red           | Left           |
| Red             | 2                  | 0      | 2     | Red           | Left           |
| Red             | 2                  | 0      | 2     | Red           | Left           |
| Orange 7.7      | 3                  | 9      | 12    | Orange 7.7    | Right          |
| Red             | 2                  | 0      | 2     | Red           | Right          |
| Orange 7.7      | 1                  | 7      | 8     | Orange 7.7    | Left           |
| Red             | 4                  | 0      | 4     | Red           | Left           |
| Red             | 17                 | 2      | 19    | Red           | Left           |
| Red             | 3                  | 0      | 3     | Red           | Left           |
| Red             | 5                  | 3      | 8     | Red           | Right          |
| Red             | 5                  | 0      | 5     | Red           | Right          |
| Red             | 3                  | 0      | 3     | Red           | Left           |
| Red             | 3                  | 1      | 4     | Red           | Right          |
| Red             | 5                  | 1      | 6     | Red           | Left           |
| Red             | 5                  | 0      | 5     | Red           | Right          |

**Red 15: Orange 2**  
**p≤0.002**

**Red 15: Orange 2**  
**p≤0.002**

**Left 11: Right 6**  
**n.s.**

**Red vs. Orange 12**

**Number of Displays**

| <b>Preferred Color</b> | <b>Red</b> | <b>Orange</b> | <b>Total</b> | <b>First Display</b> | <b>Preferred Side</b> |
|------------------------|------------|---------------|--------------|----------------------|-----------------------|
| Red                    | 9          | 5             | 14           | red                  | Left                  |
| Red                    | 4          | 0             | 4            | red                  | Left                  |
| Red                    | 3          | 0             | 3            | red                  | Right                 |
| Orange 12              | 0          | 6             | 6            | Orange 12            | Left                  |
| Red                    | 4          | 1             | 5            | red                  | Right                 |
| Orange 12              | 0          | 5             | 5            | Orange 12            | Right                 |
| Red                    | 3          | 0             | 3            | red                  | Right                 |
| Red                    | 21         | 0             | 21           | Orange 12            | Right                 |
| Red                    | 13         | 0             | 13           | red                  | Right                 |
| Orange 12              | 0          | 11            | 11           | Orange 12            | Right                 |
| Orange 12              | 0          | 6             | 6            | Orange 12            | Left                  |
| Orange 12              | 2          | 17            | 19           | Red                  | Left                  |
| Red                    | 9          | 0             | 9            | Red                  | Right                 |
| Red                    | 4          | 2             | 6            | Red                  | Right                 |
| Red                    | 11         | 0             | 11           | Red                  | Left                  |
| Red                    | 2          | 0             | 2            | Red                  | Right                 |
| Red                    | 11         | 1             | 12           | Red                  | Left                  |
| Red                    | 15         | 3             | 18           | Red                  | Left                  |
| Red                    | 8          | 4             | 12           | Red                  | Right                 |
| Red                    | 3          | 1             | 4            | Red                  | Right                 |

**Red 15: Orange 5  
p≤0.041**

**Red 15: Orange 5  
p≤0.041**

**Left 8: Right 12  
n.s.**
